# Supplementary material for: PAX6 does not regulate Nfia and Nfib expression during neocortical development
Source: PubMed Central journal article supplement (PMC4448127; doi:10.1038/srep10668), 2015-05-29
Supplement: srep10668-s1.pdf [file srep10668-s1.pdf]

## Supplementary information

### **PAX6 does not regulate *Nfia* and *Nfib* expression during neocortical development**

Jens Bunt<sup>1</sup>, Jonathan W. C. Lim<sup>1</sup>, Lu Zhao<sup>1</sup>, Sharon Mason<sup>1</sup> and Linda J. Richards<sup>1,2\*</sup>  
<sup>1</sup>Queensland Brain Institute, and <sup>2</sup>The School of Biomedical Sciences, The University of Queensland, Brisbane, 4072, Australia.

\*Author for correspondence:

Professor Linda J. Richards, PhD

NHMRC Principal Research Fellow

Head, Cortical Development and Axon Guidance Laboratory,

The Queensland Brain Institute and The School of Biomedical Sciences

The University of Queensland, St Lucia, 4072, AUSTRALIA

ph: +61 7 33466355

fax: +61 7 33466301

email: richards@uq.edu.au

Supplementary Figure S1  
Bunt *et al*

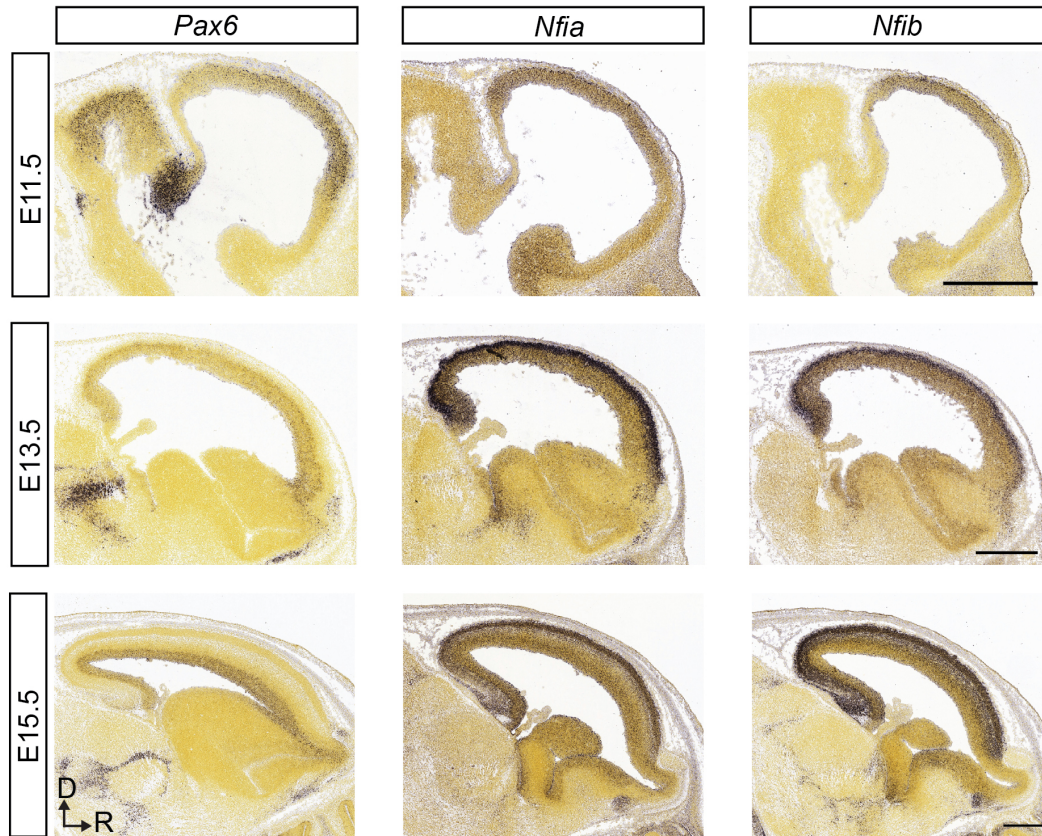

**Supplementary Figure S1. *Nfia* and *Nfib* mRNA are expressed in a high caudal to low rostral gradient during early neocortical development.** *In situ* hybridization analyses using probes for *Pax6*, *Nfia* and *Nfib* were obtained from the Allen Brain Atlas<sup>23</sup>. Analyses were performed using sagittal sections of E11.5, E13.5 and E15.5 C57Bl/6J wildtype brains. mRNA expression of all analyzed genes were detected from E11.5. While *Pax6* was expressed in a high rostral to low caudal gradient in the ventricular zone of the neocortex at all ages, *Nfia* and *Nfib* were expressed in opposing high caudal to low rostral gradients at E11.5 and E13.5, with highest expression observed in the developing cortical plate. At E15.5, the expression of *Nfia* and *Nfib* remains the highest in the cortical plate, but expression across the rostral-to-caudal axis is now more evenly distributed. Scale bar represents 500  $\mu\text{m}$ . D = dorsal; R = rostral. Image credit: Allen Institute for Brain Science.
